# Supplementary material
Source: HighWire-hosted journal article supplement (https://jnm.snmjournals.org/highwire/filestream/94139/field_highwire_adjunct_files/0/jnm071423_Supplemental_Figure_1.pdf)
Supplement: jnm071423_Supplemental_Figure_1.pdf [file jnm071423_Supplemental_Figure_1.pdf]

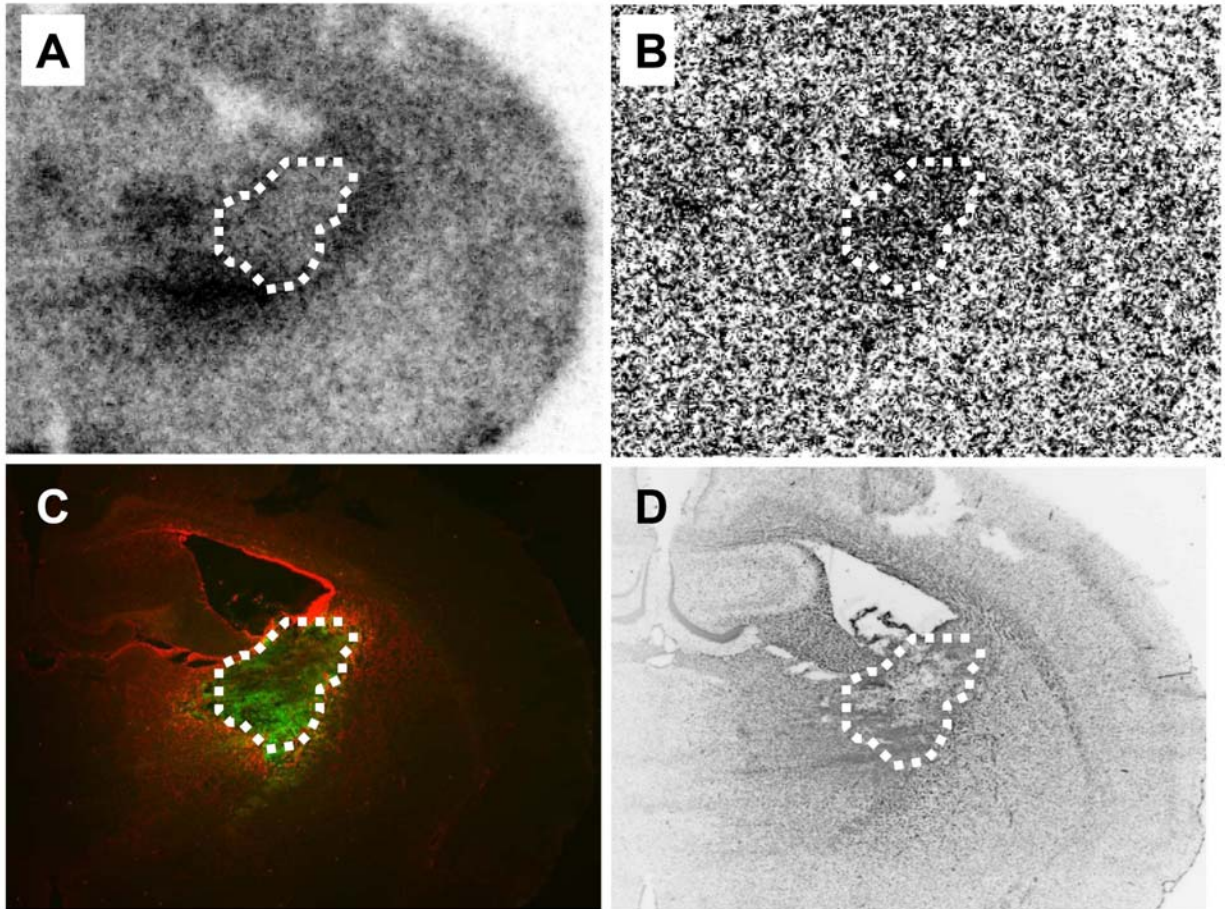

**Supplemental Figure 1.** Brain slices of rat no. 7 (Fig. 5) at higher magnification. (A)  $^{18}\text{F}$ -FET autoradiography, (B)  $^3\text{H}$ -MET autoradiography, (C) overlay of double immunofluorescent imaging for astrocytosis (GFAP, red) and macrophages (CD68, green), (D) histological staining using DAPI. The dotted line indicates the position of the area with increased GFAP and CD68 binding in the autoradiograms. Increased  $^{18}\text{F}$ -FET uptake appears to be colocalized with reactive astrocytosis in the vicinity of the hematoma (red cells) while increased  $^3\text{H}$ -MET uptake is found in the area of macrophage infiltration (green cells).
